# Supplementary material for: Pregnancy-associated plasma protein-aa regulates endoplasmic reticulum–mitochondria associations
Source: eLife. 2021 Mar 24;10:e59687. doi: 10.7554/eLife.59687 (PMC8024009; doi:10.7554/eLife.59687)
Supplement: Figure 1—source data 1. [file elife-59687-fig1-data1.xlsx]

## Sheet: Sheet1
	pappaa+/+	pappaap170
	0	1
	0	1
	1	3
	1	1
	0	0
	1	1
	1	0
	0	0
	1	2
	1	0
	1	1
	2	0
	3	0
	2	2
	1	2
	2	0
	2	1
	1	0
	1	0
	0	1
	0	0
	0	2
	0	1
	2	0
	0	0
	0	2
	0	0
	1	1
	0	1
	0	0
	1	2
	1	1
	0	0
	0	0
	0	1
	1	0
	0	1
	1	0
	0	0
	1	0
	0	0
	0	0
	0	0
	0	0
	1	3
	1	2
	2	2
	0	0
	0	0
	0	2
	1	1
	0	0
	0	2
	0	3
	1	2
	0	1
	0	2
	1	0
	0	1
	0	2
	0	1
	2	1
	1	0
	0	0
	0	0
	0	0
	0	1
	0	0
	2	1
	2	0
	0	1
	0	3
	1	2
	0	3
	0	1
	1	0
	1	0
	0	2
	0	0
	0	1
	1	1
	1	1
	0	1
	2	0
	0	1
	0	1
	0	0
	1	0
	1	3
	1	0
	1	0
	1	0
	1	1
	0	1
	1	0
	0	0
	0	1
	0	0
	0	1
	0	2
	1	3
	0	1
	0	1
	0	1
	0	1
	0	0
	1	2
	0	1
	0	0
	1	0
	1	0
	1	1
	2	0
	1	0
	0	0
	0	2
	1	1
	0	1
	0	0
	1	0
	0	1
	0	3
	0	0
	1	2
	0	2
	1	0
	0	0
	0	2
	0	0
	1	0
	0	1
	0	1
	1	1
	0	2
	0	0
	1	0
	0	0
	0	0
	1	0
	1	0
	0	0
	1	2
	1	0
	0	2
	0	2
	0	0
	1	3
	0	2
	2	0
	0	1
	0	0
	2	0
	0	1
	1	1
	1	0
	1	0
	0	0
	0	1
	0	0
	0	0
	1	1
	0	2
	0	0
	3	0
	0	0
	0	0
	1	0
	1	1
	0	1
	1	0
	0	0
	0	0
	0	0
	1	0
	0	1
	1	1
	0	1
	1	0
	1	1
	2	0
	1	0
	1	0
	0	0
	0	0
	2	3
	2	3
	2	1
	0	0
	1	0
	2	2
	1	1
	2	1
	0	0
	1	3
	1	1
	0	2
	0	1
	1	1
	0	2
	1	3
	0	2
	1	1
	1	0
	0	1
	1	0
	1	0
	1	2
	2	0
	1	2
	1	0
	2	0
	0	2
	1	0
	2	1
	2	0
	0	0
	0	1
	0	0
	0	3
	2	1
	0	1
	0	0
	0	2
	1	0
	0	1
	0	1
	1	0
	1	2
	1	2
	0	1
	0	0
	1	1
	0	0
	1	1
	0	0
	0	0
	0	0
	1	0
	0	0
	0	0
	0	0
	0	3
	2	2
	0	2
	1	0
	0	0
	0	2
	0	1
	0	1
	0	1
	0	1
	0	0
	0	0
	0	1
	0	0
	2	1
	1	2
	0	0
	0	2
	0	1
	0	2
	0	1
	2	3
	2	3
	0	0
	0	2
	1	3
	0	2
	0	1
	1	2
	1	0
	0	1
	2	2
	0	1
	0	1
	0	0
	0	0
	1	0
	0	0
	0	1
	0	0
	0	1
	1	1
	0	1
	1	2
	1	3
	1	3
	0	1
	1	1
	0	0
	0	2
	0	0
	0	2
	1	1
	0	1
	0	0
	0	1
	0	0
	0	1
	0	1
	0	3
	0	1
	1	1
	1	0
	1	1
	1	1
	1	1
	1	1
	0	1
	0	1
	2	0
	0	0
	0	2
	1	2
	0	1
	0	2
	0	1
	1	1
	1	0
	1	1
	0	2
	1	1
	0	1
	1	2
	0	0
	0	2
	1	0
	0	0
	0	0
	1	1
	0	1
	0	1
	0	0
	0	0
	0	1
	1	1
	1	3
	0	2
	0	0
	1	2
	1	1
	0	3
	0	1
	2	0
	0	0
	0	2
	0	2
	0	1
	0	0
	0	0
	0	1
	0	0
	2	0
	1	1
	0	0
	0	1
	0	2
	1	1
	0	2
	1	0
	0	3
	0	2
	0	0
	2	2
	0	0
	0	0
	0	1
	1	2
	0	0
	3	0
	1	0
	0	1
	2	0
	2	1
	1	1
	0	1
	1	1
	1	0
	0	0
	1	0
	0	2
	1	0
	1	0
	0	1
	0	0
	1	1
	0	1
	0	0
	0	0
	0	0
	1	1
	0	0
	0	1
	1	1
	1	1
	0	0
	0	0
	0	0
	0	0
	1	1
	0	2
	0	3
	0	1
	1	0
	0	0
	1	1
	2	4
	0	2
	0	0
	0	4
	0	2
	2	1
	0	2
	2	2
	1	2
	0	0
	1	0
	0	0
	0	1
	0	2
	3	2
	1	1
	0	1
	1	1
	0	1
	2	0
	2	0
	0	0
	0	0
	0	0
	0	0
	1	1
	1	0
	0	4
	2	1
	0	2
	0	1
	1	1
	0	0
	0	0
	0	2
	1	1
	1	1
	0	0
	1	0
	1	0
	1	0
	1
	0
	1
	0
	0
	1
	1
	1
	0
	0
	0
	0
mean	0.533769	0.868009
p value by t test		<0.0001
