# Supplementary material for: Pregnancy-associated plasma protein-aa regulates endoplasmic reticulum–mitochondria associations
Source: eLife. 2021 Mar 24;10:e59687. doi: 10.7554/eLife.59687 (PMC8024009; doi:10.7554/eLife.59687)
Supplement: Figure 1—source data 2. [file elife-59687-fig1-data2.xlsx]

## Sheet: Sheet1
		0	1	2	3	4
	pappaa+/+	60	31	8	1	0	% of mitochondria
	pappaap170	39	36	19	5	1
	p value by chi-square					0.0114
