# Supplementary material for: Pregnancy-associated plasma protein-aa regulates endoplasmic reticulum–mitochondria associations
Source: eLife. 2021 Mar 24;10:e59687. doi: 10.7554/eLife.59687 (PMC8024009; doi:10.7554/eLife.59687)
Supplement: Figure 1—source data 3. [file elife-59687-fig1-data3.xlsx]

## Sheet: Sheet2
	wild type						pappaa p170
	KDEL % area						KDEL % area
larva	neuromast 1	neuromast 2	neuromast 3	mean		larva	neuromast 1	neuromast 2	neuromast 3	mean
1	35.409	33.197		34.303		1	28.669	34.049	31.535	31.359
2	29.612	12.191	22.605	20.9015		2	29.313	39.295	34.444	34.304
3	39.881	27.963	28.356	33.922		3	31.389	35.35	27.723	33.3695
4	24.929	26.872	39.345	25.9005		4	28.344	36.186	38.59	32.265
5	15.51	55.901	33.592	35.7055		5	32.667	27.154	28.136	29.9105
6	33.592	29.269	39.998	31.4305		6	30.633	31.881	26.098	31.257
7	33.27	33.567	25.667	33.4185		7	27.361	25.153	32.82	26.257
8	33.896	43.277	40.554	38.5865		8	33.322	43.983	30.652	38.6525
9	32.075	33.896	43.277	32.9855		9	37.228			37.228
10	40.102	27.006	36.211	33.554		10	26.977			26.977
11	32.594			32.594		11	26.086			26.086
12	28.991			28.991		12	19.664			19.664
13	19.636			19.636		13	36.226			36.226
14	26.989			26.989		14	29.893			29.893
15	30.05			30.05		15	25.922			25.922
16	35.77			35.77		mean				30.6247
17	32.338			32.338		p value by t test				0.8349
mean				31.0044
