# Supplementary material for: Pregnancy-associated plasma protein-aa regulates endoplasmic reticulum–mitochondria associations
Source: eLife. 2021 Mar 24;10:e59687. doi: 10.7554/eLife.59687 (PMC8024009; doi:10.7554/eLife.59687)
Supplement: Figure 1—source data 4. [file elife-59687-fig1-data4.xlsx]

## Sheet: Sheet1
		pappaa+/+	pappaa p170
		115.191	391.654
		386.852	100.238
		626.544	213.7
		374.893	220.995
		208.817	653.475
		452.588	430.306
		122.178	340.167
		655.339	590.374
		351.538	362.226
		205.448	248.637
		149.931	231.372
		495.149	246.352
		234.447	475.949
		432.514	490.269
		239.916	659.512
		391.648	373.567
		260.963	446.531
		233.697	456.383
		211.132	493.617
		360.223	333.69
		348.716	379.207
		291.039	392.285
		168.38	893.455
		317.335	1023.73
		424.91	907.698
		250.697	491.611
		472.727	388.434
		129.142	643.761
		137.449	304.863
		270.738	192.62
		704.935	406.171
		610.507	210.497
		175.153	514.851
		302.362	408.383
		241.325	269.9
		455.14	442.455
		341.905	970.407
		194.829	743.112
		555.831	525.939
		309.305	219.546
		177.024	388.487
		243.888	206.572
		913.058	186.538
		164.052	358.096
		132.292	394.665
		613.262	282.426
		1259.73	251.273
		342.099	231.886
		850.867	433.808
		573.713	326.012
		491.402	258.682
		365.381	222.336
		160.812	299.587
		514.975	1206.69
		534.28	378.229
		398.321	344.856
		261.672	411.947
		172.786	529.363
		197.395	132.292
		211.191	130.762
		167.338	162.904
		304.39	268.063
		187.37	1348.89
		139.629	192.941
		269.824	788.078
		193.237	4257.73
		419.917	462.922
		680.214	363.134
		908.65	136.128
		623.385	734.136
		591.663	1284.02
		194.217	264.584
		356.597	213.904
		122.599	477.504
		336.21	141.322
		637.203	233.42
		759.419	305.235
		350.13	516.099
		303.51	283.162
		861.568	262.886
		335.904	282.517
		729.634	327.21
		486.432	764.586
		441.477	159.301
		255.478	623.253
		836.689	154.545
		483.801	704.51
		411.146	374.838
		354.397	260.032
		348.716	494.784
		535.742	584.556
		964.383	537.277
		623.65	1274.44
		479.269	376.865
		727.43	163.605
		338.833	341.617
		426.286	897.02
		134.266	175.271
		253.212	392.861
		252.316	816.765
		299.618	1872.49
		410.319	429.994
		651.929	308.689
		702.315	637.656
		166.845	520.103
		237.52	418.345
		679.245	1030.12
		109.07	520.142
		524.832	553.213
		1195.79	716.996
		1650.45	791.415
		641.743	475.473
		980.832	360.788
		341.617	72.103
		225.696	703.545
		322.966	137.182
		295.257	198.023
		958.301	197.919
		1394.42	159.849
			311.775
			391.444
			688.099
			545.455
	mean	431.971	483.79
	p value b t test		0.375
