# Supplementary material for: Pregnancy-associated plasma protein-aa regulates endoplasmic reticulum–mitochondria associations
Source: eLife. 2021 Mar 24;10:e59687. doi: 10.7554/eLife.59687 (PMC8024009; doi:10.7554/eLife.59687)
Supplement: Figure 1—source data 5. [file elife-59687-fig1-data5.xlsx]

## Sheet: Sheet1
		pappaa+/+	pappaap170
		13.92	12.079
		0.534	40.766
		63.04	5.559
		88.05	8.338
		4.27	20.619
		15.61	32.663
		10.52	9.549
		99.7	69.813
		29.89	9.843
		9.362	27.639
		8.541	9.888
		44.89	7.407
		13.67	1.058
		13.5	1.871
		38.54	2.116
		98.26	0.353
		26.17	44.431
		48.17	4.53
		90.85	2.135
		10.07	2.387
		19.1	7.328
		2.135	53.391
		12.18	20.836
		9.059	4.27
		51.58	89.048
		88.99	19.098
		9.253	3.183
		76.41	75.59
		3.203	89.896
		6.445	30.197
		85.09	20.131
		30.16	78.447
		67.15	17.2
		16.66	3.247
		6.406	30.163
		21.49	3.183
		36.46	10.128
		22.7	9.609
		54.56	24.86
		25.02	3.203
		42.73	57.74
		2.135	2.135
		98.7	76.213
		11.79	7.936
		36.74	9.059
		29.89	42.275
		59.06	8.804
		12.86	10.066
		5.182	64.057
		5.869	15.331
		16.68	61.608
		12.45	4.775
		22.82	7.699
		34.23	68.361
		10.36	37.608
		84.4	12.45
		24.2	12.9
		7.473	49.577
		80.58	21.352
		19.6	6.752
		83.06	28.085
		6.406	40.117
		90.84	61.276
		17.61	39.718
		84.05	68.859
		18.24	29.74
		11.94	4.27
		32.77	25.712
		59.58	9.549
		29.53	4.775
		33.84	18.368
		37.49	13.124
		61.92	7.117
		63.99	20.381
		88.04	11.118
		46.19	24.901
		11.5	39.551
		66.5	8.659
		6.081	89.725
		7.666	4.775
		44.59	32.771
		28.73	5.738
		8.541	26.882
		18.37	54.391
		25.66	49.847
		86.71	4.775
		14.32	18.56
		6.039	2.387
		15.1	39.959
		91.77	25.998
		68.99	5.132
		74.77	84.206
		32.98	1.423
		58.75	8.541
		73.72	44.22
		88.59	9.549
		12.92	29.311
		79.1	8.607
		21.03	1.068
		45.4	25.377
		10.07	19.098
		32.74	15.098
		19.34	4.27
		54.54	2.135
		63.41	45.574
		8.541	98.666
		7.117	14.985
		32.19	94.168
		28.36	4.501
		10.27	66.028
		8.804	7.473
		8.541	23.317
		24.35	22.098
		27.84	8.541
		13.5	1.423
		3.203	3.376
		72.97	47.41
		7.666	34.496
		10.68	67.26
		6.406	5.338
		48.47	11.477
		48.47	19.686
		17.22	0.534
		30.35	93.39
		43.55	61.626
		38.57	24.901
		52.34	27.552
		86.71	97.802
		16.16	30.572
		3.203	47.024
		23.49	64.561
			2.135
			6.366
			6.406
			24.345
			2.135
			42.731
			59.576
			79.104
			2.387
			26.064
			6.406
			75.823
			8.804
			4.775
			76.66
			90.641
			4.775
			6.752
			2.135
			83.055
			6.406
			25.623
			80.263
			75.673
			60.695
			66.33
			6.406
			46.829
			25.712
			86.431
			91.292
			1.068
			50.146
			36.376
			1.51
			18.006
			47.169
			68.093
			1.423
			56.047
			23.584
			47.265
			52.128
			13.504
			89.781
			87.947
			22.144
			34.644
			63.053
			6.406
			5.132
			23.096
			23.096
			17.215
			9.059
			29.664
			16.677
			48.173
			59.058
			14.947
			12.988
			67.859
			9.549
			13.589
			25.976
			63.17
			6.406
			30.385
			99.495
			26.411
			22.445
			57.383
			43.083
			39.372
			59.786
			14.324
			16.574
			41.951
			15.397
			1.423
			64.235
			80.829
			43.667
			20.257
			31.742
			4.402
			90.802
			1.068
			7.666
			4.775
			22.009
			10.363
			7.258
			5.869
			51.443
			15.397
			17.38
			53.551
			2.013
			39.577
			70.689
			20.729
			17.215
			85.576
			2.387
	mean	35.5604	30.3866
	p value by t test		0.0404
