# Supplementary material for: Pregnancy-associated plasma protein-aa regulates endoplasmic reticulum–mitochondria associations
Source: eLife. 2021 Mar 24;10:e59687. doi: 10.7554/eLife.59687 (PMC8024009; doi:10.7554/eLife.59687)
Supplement: Figure 2—figure supplement 1—source data 1. [file elife-59687-fig2-figsupp1-data1.xlsx]

## Sheet: Sheet1
pIGF1R CTCF
			pappaa +/+					pappaa p170
			neuromast 1	neuromast 2	neuromast 3	neuromast 4	mean	neuromast 1	neuromast 2	neuromast 3	mean
		larva 1	542271	365331	272654		393419	386467	275422	246597	302829
		larva 2	216006	248255	257990	482682	301233	181683	94506.7	83623	119938
		larva 3	321419	237209	236932		265187	181683	279618	345836	269046
		larva 4	321566	251266	222103		264978	430233	280556	180940	297243
		larva 5	421800	1.02624e+06	468098	647081	640804	259707	93369.3	213130	188735
		larva 6	441328	268224	301917		337156	198016	390410	67441.1	218622
		larva 7	293459	216516	314992		274989	358957	112785	236949	236230
		larva 8						193796	185648	111965	163803
		larva 9						148408	158660	313525	206864
		Mean					353967				222590
		P-value by t test									0.0164
