# Supplementary material for: Pregnancy-associated plasma protein-aa regulates endoplasmic reticulum–mitochondria associations
Source: eLife. 2021 Mar 24;10:e59687. doi: 10.7554/eLife.59687 (PMC8024009; doi:10.7554/eLife.59687)
Supplement: Figure 2—figure supplement 1—source data 2. [file elife-59687-fig2-figsupp1-data2.xlsx]

## Sheet: Sheet1
			pappaa +/+					pappaa p170
			neuromast 1	neuromast 2	neuromast 3	neuromast 4	mean	neuromast 1	neuromast 2	neuromast 3	neuromast 4	mean
		larva 1	249447	283805	353806		295686	297008	238461	343383		292951
		larva 2	307165	211048			259106	118125	174812	152830	147561	148332
		larva 3	376391	283259	269769		309806	109319	183661	237724		176901
		larva 4	181725	259376	210992	144669	199191	97464.4	165138	116926	156625	134038
		larva 5	179182	159819	189882		176294	244579	169165	159092		190945
		larva 6	206036	186783	139951	130389	165790	139704	143333	146642	172613	150573
		larva 7	117782	281993	218416		206064
		larva 8	222906	396339			309622
		larva 9	356330	288377			322353
		Mean					249324					182290
		P-value by t test										0.036
			182768	175437	170330	202588
