# Supplementary material for: Pregnancy-associated plasma protein-aa regulates endoplasmic reticulum–mitochondria associations
Source: eLife. 2021 Mar 24;10:e59687. doi: 10.7554/eLife.59687 (PMC8024009; doi:10.7554/eLife.59687)
Supplement: Figure 2—source data 1. [file elife-59687-fig2-data1.xlsx]

## Sheet: 1
mean number of hair cells within 3 neuromasts per larva
	wild type																	pappaa p170
	0				0.3 uM Thaps				0.7 uM Thaps				1 uM Thaps						0				0.3 uM Thaps				0.7 uM Thaps				1 uM Thaps
	neuromast 1	neuromast 2	neuromast 3	mean	neuromast 1	neuromast 2	neuromast 3	mean	neuromast 1	neuromast 2	neuromast 3	mean	neuromast 1	neuromast 2	neuromast 3	mean			neuromast 1	neuromast 2	neuromast 3	mean	neuromast 1	neuromast 2	neuromast 3	mean	neuromast 1	neuromast 2	neuromast 3	mean	neuromast 1	neuromast 2	neuromast 3	mean
larva 1	15	12	10	12.3333	12	11	11	11.3333	9	10	8	9	10	6	7	7.66667		larva 1	17	10	12	13	13	10	7	10	7	8	12	9	8	9	9	8.66667
larva 2	13	12	14	13	7	12	9	9.33333	6	6	6	6	10	8	11	9.66667		larva 2	12	13	14	13	7	13	11	10.3333	7	7	7	7	5	5	8	6
larva 3	14	12	14	13.3333	13	10	12	11.6667	6	10	11	9	12	9	8	9.66667		larva 3	16	13	18	15.6667	9	12	9	10	7	8	9	8	7	6	6	6.33333
larva 4	14	9	13	12	9	9	9	9	8	7	7	7.33333	8	9	6	7.66667		larva 4	12	10	12	11.3333	10	8	3	7	5	6	7	6	3	6	9	6
larva 5	10	12	13	11.6667	12	9	13	11.3333	6	6	7	6.33333	8	6	7	7		larva 5	15	11	10	12	8	9	12	9.66667	7	8	7	7.33333	4	5	6	5
larva 6	15	10	9	11.3333	8	11	14	11	8	6	11	8.33333	6	10	10	8.66667		larva 6	19	19	14	17.3333	8	15	10	11	9	10	7	8.66667	7	5	5	5.66667
larva 7	12	11	13	12	10	12	14	12	9	9	5	7.66667	10	9	7	8.66667		larva 7	20	13	16	16.3333	10	11	11	10.6667	9	10	7	8.66667	4	7	6	5.66667
larva 8	13	11	9	11	9	10	11	10	10	8	10	9.33333	8	9	7	8		larva 8	17	14	12	14.3333	11	12	6	9.66667	9	11	9	9.66667	8	8	6	7.33333
larva 9					10	13	9	10.6667	10	11	10	10.3333	7	8	7	7.33333		larva 9					10	6	12	9.33333					6	8	5	6.33333
larva 10					8	9	10	9	11	8	8	9	9	8	11	9.33333		larva 10					10	11	11	10.6667					8	7	6	7
larva 11													7	6	8	7		larva 11					10	10	11	10.3333					8	7	7	7.33333
larva 12													6	8	7	7		larva 12													5	5	6	5.33333
larva 13													8	7	7	7.33333
mean				12.0833				10.5333				8.23333				8.13889		mean				14.125				9.87879				8.04167				6.38889
% HC survival=[(mean number of hair cells within 3 neuromasts after treatment)/ (mean number of hair cells in vehicle treated group)] X 100
				wild type			pappaa p170
			Thapisgargin (uM)	0.3	0.7	1	0.3	0.7	1
			larva 1	93.819	74.5033	63.4658	70.7714	63.6943	61.3352
			larva 2	77.2627	49.6689	80.0221	73.1305	49.54	42.4628
			larva 3	96.5784	74.5033	80.0221	70.7714	56.6171	44.8219
			larva 4	74.5033	60.7064	63.4658	49.54	42.4628	42.4628
			larva 5	93.819	52.4283	57.947	68.4124	51.899	35.3857
			larva 6	91.0596	68.9845	71.7439	77.8485	61.3352	40.1038
			larva 7	99.3377	63.4658	71.7439	75.4895	61.3352	40.1038
			larva 8	82.7815	77.2627	66.2252	68.4124	68.4124	51.899
			larva 9	88.3002	85.5408	60.7064	66.0533		44.8219
			larva 10	74.5033	74.5033	77.2627	75.4895		49.54
			larva 11			57.947	73.1305		51.899
			larva 12			57.947			37.7448
			larva 13			60.7064
			mean hair cell survival (% vehicle-treated group)	87.1965	68.1567	66.8619	69.9136	56.912	45.2151
		2-way ANOVA with Holm-Sidak correction		<0.0001	0.0091	<0.0001

## Sheet: Sheet1
support cells
	wild type
	0				1 uM Thaps
	neuromast 1	neuromast 2	neuromast 3	mean	neuromast 1	neuromast 2	neuromast 3	mean
larva 1	38	45	46	43	29	43	39	37
larva 2	52	42	41	45	37	46	46	43
larva 3	52	47	52	50.3333	29	40	39	36
larva 4	50	39	42	43.6667	38	42	41	40.3333
larva 5	42	43	41	42	22	37	40	33
larva 6	38	54	35	42.3333	34	34	33	33.6667
larva 7	39	39	43	40.3333	29	21	35	28.3333
larva 8	48	39	40	42.3333	24	24	24	24
larva 9
larva 10
larva 11
larva 12
mean				43.625				34.4167
								0.00340994
