# Supplementary material for: Pregnancy-associated plasma protein-aa regulates endoplasmic reticulum–mitochondria associations
Source: eLife. 2021 Mar 24;10:e59687. doi: 10.7554/eLife.59687 (PMC8024009; doi:10.7554/eLife.59687)
Supplement: Figure 2—source data 2. [file elife-59687-fig2-data2.xlsx]

## Sheet: 1
	wild type																		pappaa p170
	vehicle				10 uM Thapsigargin				vehicle				20 uM Thapsigargin						vehicle				10 uM Thapsigargin				vehicle				20 uM Thapsigargin
	neuromast 1	neuromast 2	neuromast 3	mean	neuromast 1	neuromast 2	neuromast 3	mean	neuromast 1	neuromast 2	neuromast 3	mean	neuromast 1	neuromast 2	neuromast 3	mean			neuromast 1	neuromast 2	neuromast 3	mean	neuromast 1	neuromast 2	neuromast 3	mean	neuromast 1	neuromast 2	neuromast 3	mean	neuromast 1	neuromast 2	neuromast 3	mean
larva 1	13	9	9	10.3333	7	6	8	7	15	12	10	12.3333	11	12	12	11.6667		larva 1	8	15	11	11.3333	12	12	12	12	17	10	12	13	11	7	17	11.6667
larva 2	11	10	11	10.6667	13	11	19	14.3333	13	12	14	13	11	8	10	9.66667		larva 2	8	7	4	6.33333	12	9	14	11.6667	12	13	14	13	7	9	11	9
larva 3	9	12	16	12.3333	7	8	12	9	14	12	14	13.3333	7	8	9	8		larva 3	13	14	19	15.3333	9	7	11	9	16	13	18	15.6667	11	6	13	10
larva 4	14	13	13	13.3333	13	13	16	14	14	9	13	12	10	7	8	8.33333		larva 4	15	9	12	12	8	14	10	10.6667	12	10	12	11.3333	8	9	9	8.66667
larva 5	12	10	12	11.3333	10	12	12	11.3333	10	12	13	11.6667	11	6	11	9.33333		larva 5	13	12	12	12.3333	5	2	0	2.33333	15	11	10	12	5	8	8	7
larva 6	11	7	10	9.33333	8	13	15	12	15	10	9	11.3333	6	9	10	8.33333		larva 6	9	13	15	12.3333	8	12	12	10.6667	19	19	14	17.3333	9	11	9	9.66667
larva 7	15	11	9	11.6667	9	12	15	12	12	11	13	12	11	12	12	11.6667		larva 7	14	18	12	14.6667	12	11	11	11.3333	20	13	16	16.3333	10	12	9	10.3333
larva 8	8	7	8	7.66667	13	10	9	10.6667	13	11	9	11	10	10	10	10		larva 8	9	11	10	10	12	8	10	10	17	14	12	14.3333	10	12	9	10.3333
larva 9	9	11	10	10	12	13	13	12.6667					9	9	11	9.66667		larva 9	10	12	13	11.6667	11	7	9	9					13	8	10	10.3333
larva 10	9	9	13	10.3333	16	8	8	10.6667					10	7	6	7.66667		larva 10	9	9	10	9.33333	5	8	9	7.33333					9	10	11	10
larva 11	12	13	9	11.3333	8	12	9	9.66667					11	9	15	11.6667		larva 11	14	15	13	14	11	11	10	10.6667					13	9	10	10.6667
larva 12	12	14	9	11.6667	8	6	13	9					13	15	10	12.6667		larva 12	16	16	13	15									11	7	9	9
larva 13													10	13	10	11		larva 13
mean				10.8333				11.0278				12.0833				9.97436		mean				12.0278				9.51515				14.125				9.72222
% HC survival=[(mean number of hair cells within 3 neuromasts after treatment)/ (mean number of hair cells in vehicle treated group)] X 100
				wild type			pappaa p170
				10 uM Thapsigargin	20 uM Thapsigargin		10 uM Thapsigargin	20 uM Thapsigargin
			larva 1	64.6353	96.5784		99.7506	82.5666
			larva 2	132.348	80.0221		96.9798	63.6943
			larva 3	83.1025	66.2252		74.813	70.7714
			larva 4	129.271	68.9845		88.6672	61.3352
			larva 5	104.648	77.2627		19.396	49.54
			larva 6	110.803	68.9845		88.6672	68.4124
			larva 7	110.803	96.5784		94.2089	73.1305
			larva 8	98.4918	82.7815		83.1255	73.1305
			larva 9	116.959	80.0221		74.813	73.1305
			larva 10	98.4918	63.4658		60.9587	70.7714
			larva 11	89.2582	96.5784		88.6672	75.4895
			larva 12	83.1025	104.857			63.6943
			larva 13		91.0596
			mean hair cell survival (% vehicle-treated group)	101.826	82.5692		79.0952	68.8055
		2-way ANOVA with Holm-Sidak correction		0.0047	0.0476
