# Supplementary material for: Pregnancy-associated plasma protein-aa regulates endoplasmic reticulum–mitochondria associations
Source: eLife. 2021 Mar 24;10:e59687. doi: 10.7554/eLife.59687 (PMC8024009; doi:10.7554/eLife.59687)
Supplement: Figure 2—source data 3. [file elife-59687-fig2-data3.xlsx]

## Sheet: 1
	wild type													hsp70:dnIGF1Ra-GFP
	vehicle				10 μM Thapsigargin				20 μM Thapsigargin					vehicle				10 μM Thapsigargin				20 μM Thapsigargin
	neuromast 1	neuromast 2	neuromast 3	mean	neuromast 1	neuromast 2	neuromast 3	mean	neuromast 1	neuromast 2	neuromast 3	mean		neuromast 1	neuromast 2	neuromast 3	mean	neuromast 1	neuromast 2	neuromast 3	mean	neuromast 1	neuromast 2	neuromast 3	mean
larva 1	13	16	14	14.3333	18	13	11	14	13	12	15	13.3333		17	14	10	13.6667	13	12	16	13.6667	11	14	13	12.6667
larva 2	13	12	14	13	14	14	11	13	14	12	16	14		13	14	13	13.3333	14	15	14	14.3333	14	10	12	12
larva 3	13	16	10	13	9	17	15	13.6667	13	10	11	11.3333		15	15	12	14	17	17	11	15	16	17	15	16
larva 4	13	14	17	14.6667	12	11	15	12.6667	16	14	10	13.3333		17	17	14	16	14	16	14	14.6667	15	13	10	12.6667
larva 5	14	13	18	15	11	11	15	12.3333	12	12	15	13		13	15	15	14.3333	15	15	13	14.3333	13	14	16	14.3333
larva 6	17	16	13	15.3333	12	15	15	14	12	13	5	10		17	15	12	14.6667	16	12	12	13.3333	16	10	8	11.3333
larva 7	15	16	15	15.3333	16	13	12	13.6667	11	10	12	11		16	16	15	15.6667	12	16	15	14.3333	13	13	10	12
larva 8	13	10	10	11	14	12	13	13	5	11	10	8.66667		15	15	10	13.3333	15	13	12	13.3333	14	12	18	14.6667
larva 9	15	16	11	14					10	11	12	11		15	9	19	14.3333	16	13	16	15	12	15	10	12.3333
larva 10	14	12	14	13.3333					13	16	13	14						12	11	14	12.3333	11	14	9	11.3333
larva 11
mean				13.9				13.2917				11.9667					14.3704				14.0333				12.9333
	heatshock
	wild type													hsp70:dnIGF1Ra-GFP
	vehicle				10 μM Thapsigargin				20 μM Thapsigargin					vehicle				10 μM Thapsigargin				20 μM Thapsigargin
	neuromast 1	neuromast 2	neuromast 3	mean	neuromast 1	neuromast 2	neuromast 3	mean	neuromast 1	neuromast 2	neuromast 3	mean		neuromast 1	neuromast 2	neuromast 3	mean	neuromast 1	neuromast 2	neuromast 3	mean	neuromast 1	neuromast 2	neuromast 3	mean
larva 1	18	17	17	17.3333	18	12	15	15	11	12	12	11.6667		17	15	12	14.6667	11	15	16	14	13	7	12	10.6667
larva 2	15	13	17	15	12	13	18	14.3333	12	16	12	13.3333		12	12	18	14	9	13	10	10.6667	11	8	12	10.3333
larva 3	13	14	14	13.6667	15	13	14	14	11	7	10	9.33333		12	13	11	12	10	9	14	11	10	11	10	10.3333
larva 4	15	16	15	15.3333	14	14	15	14.3333	10	9	10	9.66667		15	13	13	13.6667	12	11	12	11.6667	7	9	9	8.33333
larva 5	13	16	15	14.6667	16	15	15	15.3333	13	13	14	13.3333		13	12	11	12	10	14	16	13.3333	7	10	7	8
larva 6	12	16	11	13	15	12	14	13.6667	13	13	13	13		14	16	15	15	13	9	10	10.6667	8	6	12	8.66667
larva 7	15	14	13	14	15	14	12	13.6667	10	8	13	10.3333		17	13	12	14	15	16	12	14.3333	10	9	11	10
larva 8	13	13	14	13.3333	16	15	14	15	13	13	11	12.3333		13	12	8	11	15	13	14	14	5	8	11	8
larva 9	13	14	12	13	11	14	15	13.3333	12	13	15	13.3333		18	17	13	16	11	9	9	9.66667	9	11	13	11
larva 10	13	10	12	11.6667										14	13	9	12
				14.1				14.2963				11.8148					13.4333				12.1481				9.48148
% HC survival=[(mean number of hair cells within 3 neuromasts after treatment)/ (mean number of hair cells in no heatshock and vehicle treated group)] X 100
	wild type							hsp70:dnIGF1Ra-GFP
HS	HS	no HS	HS	no HS	HS		HS	HS	no HS	HS	no HS	HS
Thapsigargin	vehicle	10 μM	10 μM	20 μM	20 μM		Thapsigargin	vehicle	10 μM	10 μM	20 μM	20 μM
larva 1	103.118	100.719	107.914	95.9233	83.9329			102.064	95.1055	97.4252	88.1466	74.2287
larva 2	93.5252	93.5252	103.118	100.719	95.9233			97.4252	99.7448	74.2287	83.5073	71.9091
larva 3	93.5252	98.3213	100.719	81.5348	67.1463			83.5073	104.384	76.5484	111.343	71.9091
larva 4	105.516	91.1271	103.118	95.9233	69.5444			95.1055	102.064	81.1877	88.1466	57.9912
larva 5	107.914	88.729	110.312	93.5252	95.9233			83.5073	99.7448	92.7859	99.7448	55.6715
larva 6	110.312	100.719	98.3213	71.9424	93.5252			104.384	92.7859	74.2287	78.868	60.3108
larva 7	110.312	98.3213	98.3213	79.1367	74.3405			97.4252	99.7448	99.7448	83.5073	69.5894
larva 8	79.1367	93.5252	107.914	62.3501	88.729			76.5484	92.7859	97.4252	102.064	55.6715
larva 9	100.719		95.9233	79.1367	95.9233			111.343	104.384	67.2698	85.827	76.5484
larva 10	95.9233			100.719				83.5073	85.827		78.868
mean hair cell survival (% vehicle-treated group	100	95.6235	102.851	86.0911	84.9987			93.4818	97.6572	84.5383	90.0023	65.9811
P-value by 2-way ANOVA (TLF vs. hsp70:dnIGF1R-GFP)	0.3689	0.7009	0.0007	0.6112	0.0005
