# Supplementary material for: Pregnancy-associated plasma protein-aa regulates endoplasmic reticulum–mitochondria associations
Source: eLife. 2021 Mar 24;10:e59687. doi: 10.7554/eLife.59687 (PMC8024009; doi:10.7554/eLife.59687)
Supplement: Figure 2—source data 4. [file elife-59687-fig2-data4.xlsx]

## Sheet: 1
	wild type																				pappaa p170
	vehicle				20 uM Thapsigargin				20 uM Thapsigargin+100 NBI				20 uM Thapsigargin+120 NBI								vehicle				20 uM Thapsigargin				20 uM Thapsigargin+120 NBI				20 uM Thapsigargin+120 NBI
	neuromast 1	neuromast 2	neuromast 3	mean	neuromast 1	neuromast 2	neuromast 3	mean	neuromast 1	neuromast 2	neuromast 3	mean	neuromast 1	neuromast 2	neuromast 3	mean					neuromast 1	neuromast 2	neuromast 3	mean	neuromast 1	neuromast 2	neuromast 3	mean	neuromast 1	neuromast 2	neuromast 3	mean	neuromast 1	neuromast 2	neuromast 3	mean
larva 1	15	12	10	12.3333	11	12	12	11.6667	10	11	8	9.66667	12	14	9	11.6667				larva 1	17	10	12	13	11	7	17	11.6667	15	11	12	12.6667	9	9	14	10.6667
larva 2	13	12	14	13	11	8	10	9.66667	14	14	13	13.6667	10	12	9	10.3333				larva 2	12	13	14	13	7	9	11	9	13	10	11	11.3333	14	13	15	14
larva 3	14	12	14	13.3333	7	8	9	8	12	9	12	11	10	11	12	11				larva 3	16	13	18	15.6667	11	6	13	10	11	10	12	11	13	11	14	12.6667
larva 4	14	9	13	12	10	7	8	8.33333	10	10	18	12.6667	10	11	12	11				larva 4	12	10	12	11.3333	8	9	9	8.66667	15	17	11	14.3333	13	13	11	12.3333
larva 5	10	12	13	11.6667	11	6	11	9.33333	12	8	15	11.6667	11	13	9	11				larva 5	15	11	10	12	5	8	8	7	12	12	9	11	11	12	9	10.6667
larva 6	15	10	9	11.3333	6	9	10	8.33333	13	13	13	13	13	11	10	11.3333				larva 6	19	19	14	17.3333	9	11	9	9.66667	11	7	10	9.33333	10	11	15	12
larva 7	12	11	13	12	11	12	12	11.6667	12	9	8	9.66667	14	10	13	12.3333				larva 7	20	13	16	16.3333	10	12	9	10.3333	10	15	9	11.3333	13	10	11	11.3333
larva 8	13	11	9	11	10	10	10	10	8	8	10	8.66667	18	13	10	13.6667				larva 8	17	14	12	14.3333	10	12	9	10.3333	9	10	10	9.66667	14	11	10	11.6667
larva 9					9	9	11	9.66667	12	10	10	10.6667	11	10	11	10.6667				larva 9					13	8	10	10.3333	8	9	8	8.33333	16	15	7	12.6667
larva 10					10	7	6	7.66667					14	10	9	11				larva 10					9	10	11	10	14	10	14	12.6667	15	14	9	12.6667
larva 11					11	9	15	11.6667					9	9	10	9.33333				larva 11					13	9	10	10.6667	12	9	9	10	16	12	10	12.6667
larva 12					13	15	10	12.6667												larva 12					11	7	9	9	11	12	12	11.6667
larva 13					10	13	10	11																					14	15	10	13
mean				12.0833				9.97436				11.1852				11.2121				mean				14.125				9.72222				11.2564				12.1212
% HC survival=[(mean number of hair cells within 3 neuromasts after treatment)/ (mean number of hair cells in vehicle treated group)] X 100
				wild type				pappaa p170
				20 uM Thapsigargin	20 uM Thaps+100 NBI	20 uM Thaps+120 NBI		20 uM Thapsigargin	20 uM Thaps+100 NBI	20 uM Thaps+120 NBI
			larva 1	96.5784	80.0221	96.5784		82.5666	89.6438	75.4895
			larva 2	80.0221	113.135	85.5408		63.6943	80.2076	99.08
			larva 3	66.2252	91.0596	91.0596		70.7714	77.8485	89.6438
			larva 4	68.9845	104.857	91.0596		61.3352	101.439	87.2847
			larva 5	77.2627	96.5784	91.0596		49.54	77.8485	75.4895
			larva 6	68.9845	107.616	93.819		68.4124	66.0533	84.9257
			larva 7	96.5784	80.0221	102.097		73.1305	80.2076	80.2076
			larva 8	82.7815	71.7439	113.135		73.1305	68.4124	82.5666
			larva 9	80.0221	88.3002	88.3002		73.1305	58.9762	89.6438
			larva 10	63.4658		91.0596		70.7714	89.6438	89.6438
			larva 11	96.5784		77.2627		75.4895	70.7714	89.6438
			larva 12	104.857				63.6943	82.5666
			larva 13	91.0596					92.0028
			mean hair cell survival (% vehicle-treated group)	82.5692	92.5926	92.8156		68.8055	79.6632	85.7835
		2-way ANOVA with Holm-Sidak correction			0.0761	0.0754			0.0317	0.0013
