# Supplementary material for: Pregnancy-associated plasma protein-aa regulates endoplasmic reticulum–mitochondria associations
Source: eLife. 2021 Mar 24;10:e59687. doi: 10.7554/eLife.59687 (PMC8024009; doi:10.7554/eLife.59687)
Supplement: Figure 3—source data 1. [file elife-59687-fig3-data1.xlsx]

## Sheet: Sheet1
	pappaa+/+	pappaap170
	188912	281184
	248749	169500
	158153	229986
	360407	203182
	129837	247420
	210057	143001
	225867	114382
	63551.4	137465
	126953	213044
	286784	77867.8
	354110	71489.4
	258968	90203.7
	362177	279986
	185052	61853.8
	332644	132662
	91860.6	175677
	326270	90977.8
	117893	129894
	87012.2	91557.3
	108361	286618
	154194	660577
	130788	218498
	78304.7	938560
	114595	382399
	61808.5	372220
	132306	94730.6
	101861	81764.4
	69665	171942
	139808	182872
	228373	302220
	188642	784783
	224896	153617
	119894	111693
	109090	70387.1
	152929	64298.3
	253821	86923.9
	207718	538970
	126295	259005
	268914	825874
	294251	145890
	180498	150625
	282990	245471
	142909	121032
	176924	153268
	88929.4	244858
	290473	176086
	447397	186335
	987345	430578
	443726	214635
	172019	79501.7
	953056	939592
	711641	1.01919e+06
	222042	361601
	191752	229440
	95842	531765
	52713.9	169618
	225675	264279
	204690	65487.5
	172881	72925.2
	129771	146800
	1.04321e+06	213018
	122897	176824
	304822	200293
	116009	271285
	148124	283433
	140349	102181
	380895	211146
	248768	138886
	155186	144408
	214858	553231
	155535	534727
	223173	206959
	238190	343844
	237262	169627
	172184	141855
	84650.5	123911
	126292	108119
	78477.1	634009
	97577.3	173570
	134741	620977
	113385	87298.8
	155612	109390
	127599	194484
	108219	132754
	121291	208920
	77596.9	142769
	82949.5	163419
	134321	137461
	108615	131367
	146128	109828
	204218	914109
	306583	272607
	576434	1.19711e+06
	157834	157772
	136193	299891
	456475	134122
	221311	193584
	84257.4	105536
	852648	171089
	509724	148079
	361068	158040
	121529	158001
	598046	266336
	424991	254790
	544654	347379
	255584	284340
	167972	410320
	359214	208852
	825948	175400
	617212	138877
	141924	130249
	123154	154771
	401668	513500
	159711	90251.7
	454491	190215
	295611	319006
	458144	253324
	121766	192979
	201336	165446
	203236	593311
	128907	180061
	207834	212013
	909158	130551
	380343	118514
	84757.8	167053
	203401	89388.9
	116853	371424
	31755.3	357512
	73698.5	139681
	133261	254421
	169213	147402
	394667	83030.8
	177002	168231
	91999.8	313640
	169382	436229
	106741	180220
	190027	79421.7
	192285	108352
	324036	314752
	610566	174225
	597227	285627
	389185	136861
	483334	837257
	97870.1	313000
	66066.1	371708
	398318	116133
	189541	283805
	332598	97849.7
	103395	261787
	124357	168599
	484183	197343
	112859	188868
	106806	344329
	201589	237643
	262494	295263
	187431	227217
	86663.6	102360
	149688	200961
	383219	100086
	216213	247640
	207752	141547
	328524	138852
	175204	154925
	427859	119358
	135457	119974
	175204	114591
	160136	169146
	292861	123367
	839359	51335.4
	429115	101368
	569221	84873.2
	180890	88790.2
	427510	135292
	180514	84488.5
	78967.9	125344
	221959	86105.7
	138434	71739.5
	220211	55951.8
	1.56953e+06	54142.1
	188810	74645.8
	244578	79857.4
	265863	25907.7
	174022	49221.4
	261867	120235
	358831	57554.3
	531576	103067
	120816	70913.3
	494201	203574
	289569	333579
	106791	147124
	132254	426420
	181505	165206
	289281	68464.2
	350935	72733.1
	170828	148677
	288497	142620
	309339	80596.9
	518186	70989.7
	462822	205883
	129320	116649
	163351	117213
	564303	88238.9
	89586.2	71965.3
	282182	118021
	327322	92124.7
	941220	98129.8
	772657	69566.8
	547962	83523.7
	129768	77956.5
	552573	213978
	78488.7	69347.5
	433886	68948.1
	190416	91987.1
	104565	83380.1
	319705	107322
	485522	88572.5
	167566	157243
	129133	85430.4
	106659	167187
	395019	151121
	441850	153821
	162897	54700.2
	324762	185438
	371503	46546.5
	434515	258884
	113461	138446
	419972	182042
	163802	82348.7
	227606	57456.9
	262718	141420
	182592	66202.7
	215056	40759.3
	354936	109081
	416820	126136
	436597	91664.8
	274464	92457.6
	179958	264286
	342706	70302.5
	343607	49368.3
	541493	179658
	396757	77109.2
	282297	65297.6
	603679	94828.8
	323114	31225.9
	429631	59773.6
	438596	53600.3
	293820	62152.8
	340090	225851
	91470.7	57647.9
	398128	67470
	251816	74504.7
	335682	48284
	627795	207316
	249927	126311
	179651	56232.9
	298895	83977.8
	321950	153902
	492488	36682.2
	426024	96326
	357122	74886.3
	257684	92985.9
	81188.2	94918.8
	265156
	264274
	291388
	407335
	177903
	311460
	318361
	290900
	158497
	463872
mean	276524	195064
p value by t test		<0.0001
