# Supplementary material for: Pregnancy-associated plasma protein-aa regulates endoplasmic reticulum–mitochondria associations
Source: eLife. 2021 Mar 24;10:e59687. doi: 10.7554/eLife.59687 (PMC8024009; doi:10.7554/eLife.59687)
Supplement: Figure 3—source data 2. [file elife-59687-fig3-data2.xlsx]

## Sheet: Sheet1
	pappaa+/+	pappaap170
	1761.64	2276.74
	1908.71	1603.02
	1541.56	2375.75
	3531.43	1953.21
	1540.04	1846.21
	2210.55	1458.05
	1840.84	1286.33
	1077.4	1440.82
	1325.57	1937.93
	2646.49	1084.17
	2302.38	1017.76
	2480.14	1287.99
	3757.39	2134.45
	1912.13	1289.09
	3437.5	1401.48
	1141.83	1658.27
	2825.74	1200.1
	1365.34	1379.69
	1130.19	1420.12
	1310.76	1995.53
	1958.87	3572.36
	1492.47	1820.95
	1118.39	6234.73
	1253.43	2506.59
	944.486	2615.35
	1368.13	1168.83
	1264.23	1050.6
	1017.75	1997.34
	1403.44	1650.78
	2142.95	1977.11
	1861.91	3618.81
	1808.25	1526.45
	1325.01	1284.77
	1341.58	1018.56
	1478.32	1075.28
	1994.59	1139.71
	1803.59	3175.71
	1302.44	2226.63
	2096.26	3640.39
	2477.49	1412.06
	1624	1539.33
	2021.48	2167.66
	1546.42	1334.39
	1613.58	1444.28
	1316.61	1895
	2241.42	1560.29
	2756.26	1729.3
	5146.3	2666.86
	3940.38	1775
	1681.42	1046.64
	5480.91	3801.83
	4411.01	4488.7
	1727.31	2635.76
	1623.83	1982.58
	1483.1	4159.63
	923.4	1647.51
	2043.4	2210.3
	2375.15	954.942
	1582.56	995.232
	1739.34	1438.9
	5752.48	1894.66
	1301.13	1631.02
	2364.49	2115.39
	1279.88	1934.35
	1433.23	2154.9
	1376.06	1302.44
	3020.44	1667.14
	1848.8	1427.83
	1567.68	1436.78
	1810.02	3728.84
	1558.73	3185.88
	1780.05	1669.57
	2502.62	2291.39
	2178.21	1559.94
	1784.28	1846.2
	1072.15	1362.9
	1412.57	1305.08
	1029.01	2966
	1162.57	1500.4
	1425.2	3686.88
	1469.43	1155.56
	1517.16	1240.2
	1329.39	1844.81
	1270.6	1399.24
	1272.68	1678.4
	1049.96	1349.92
	1204.29	1727.82
	1359.64	1440.32
	1250.43	1348.83
	1637.16	1234.9
	2335.56	4514.21
	2499.83	1916.97
	4639.48	5593.7
	1526.53	1491.85
	1869.48	2209.78
	2623.78	1522.5
	1774.59	1870.55
	1076.89	1225.04
	4100.71	1565.69
	3681.39	1513.39
	2744.7	1635.96
	1298.22	1472
	3060.22	1893.98
	2642.39	1819.72
	3070.1	2175.25
	1980.21	2164.74
	1513.36	2725.87
	2911.03	1698.33
	7593.4	1562.27
	3925.37	1409.9
	1501.66	1375.47
	1403.35	1409.99
	3305.61	2743.04
	1686.5	1199.68
	2557.08	1762.24
	2436.03	2072.26
	3533.77	1853.54
	1323.53	1599.14
	2243.09	1539.02
	1985.48	4431.53
	1605.45	1652.21
	1802.54	1676.8
	3949.93	1328.65
	2345.82	1243.99
	1295.83	1561.54
	1813.93	1102.42
	1278.15	2767.05
	754.754	3131.07
	1100.21	1366.35
	1620.46	2502.51
	1809.33	1620.2
	3575.11	1050.94
	1549.52	1605.83
	1177.35	2218.16
	1561.6	3162.31
	1178.19	1621.61
	1607.66	1054.84
	1581.35	1206.23
	2391.52	2582.34
	3319.91	1902.15
	2937.57	2576.8
	4143.93	1467.95
	4532.9	6974.68
	1184.84	2091
	969.752	3099.11
	3384.13	1233.27
	1658.61	2017.84
	2466.35	1355.44
	1300.84	2220.16
	1472.93	1514.25
	2834.49	1802.13
	1251.22	1626.76
	1535.86	2673.98
	1630.6	1841.79
	1856.65	2313.31
	1629.1	1806.82
	1170.8	1137.88
	1680.19	1683.1
	3259.1	1180.39
	1753.33	2376.58
	1731.76	1359.07
	2373.48	1372.81
	2048.14	1411.09
	3077.29	1259.39
	1459.68	1258.55
	1775.62	1214.12
	1563.19	1542.18
	2418.49	1612.63
	5545.05	820.753
	4441.77	1158
	3063.58	1077.06
	1782.12	1090.32
	3691.99	1313.87
	1907.17	1049.89
	1107.36	1289.34
	1765.88	1112.83
	1655.3	1019.44
	1800.22	891.604
	9677.4	871.731
	2202.84	1018.58
	2483.88	1072.62
	2424.05	638.449
	1854.67	854.721
	2402.66	1566.99
	2439.91	926.095
	4081.07	1218.19
	1443.5	1033.29
	3285.96	1678.93
	2491.95	2326.01
	1328.69	1545.03
	1371.62	2959.08
	1616.64	1562.62
	2185.68	1069.33
	2378.77	992.007
	1733.66	1534.61
	2005.13	1541.69
	2196.68	1032.07
	3753.83	1002.87
	4578.26	1630.32
	1530	1224.11
	1580.7	1335.69
	3762.75	1084.62
	1091.92	1010.09
	2484.46	1470.91
	2199.78	1119.58
	6354.94	1170.26
	4267.81	958.586
	4522.86	1048.23
	1418.44	1041.8
	3003.2	1987.6
	1055.51	965.38
	3854.72	958.43
	1735.11	1333.76
	1210.81	1052
	2535.79	1295.94
	3195.19	1141.73
	1634.65	1752.18
	1459.69	1053.49
	1281.78	1532.08
	3199.76	1435.47
	3656.02	1440.41
	1569.09	871.155
	2614.4	1545.42
	2645.82	789.7
	3437.8	2364.09
	1303.13	1550.5
	2566.77	1654.48
	1513.85	1059.48
	1820.36	886.688
	2323.74	1563.28
	1784.81	932.46
	2804.94	732.37
	3131.64	1256.54
	3371.71	1680.24
	3944.12	1090.05
	2220.59	1131.46
	2104.34	2622.01
	3291.54	985.847
	3540.47	803.814
	3607.87	1777.49
	3078.93	1024.75
	1968.51	944.357
	4459.21	1131.16
	3750.08	670.014
	3321.4	887.824
	4092.59	836.582
	2586.51	972.814
	2965.31	2158.63
	1134.42	861.217
	2815.98	967.165
	1897.71	1031.2
	2507.24	797.033
	3672.16	1901.62
	1912.27	1357.11
	1675.59	872.324
	2617.61	1074.44
	2697.74	1632.25
	4427.85	737.491
	3369.09	1167.31
	2346.78	1029.13
	2944.89	1196.8
	1126.32	1150.37
	2033.35
	2317.63
	3238.74
	3300.27
	1857.37
	3154.33
	2504.89
	2047.68
	2077.05
	3038.56
mean	2295.33	1685.8
p value by t test		<0.0001
