# Supplementary material for: Pregnancy-associated plasma protein-aa regulates endoplasmic reticulum–mitochondria associations
Source: eLife. 2021 Mar 24;10:e59687. doi: 10.7554/eLife.59687 (PMC8024009; doi:10.7554/eLife.59687)
Supplement: Figure 3—source data 3. [file elife-59687-fig3-data3.xlsx]

## Sheet: Sheet1
	pappaa+/+	pappaap170
	0.765	0.682
	0.858	0.829
	0.836	0.512
	0.363	0.669
	0.688	0.912
	0.54	0.845
	0.838	0.869
	0.688	0.832
	0.908	0.713
	0.515	0.832
	0.839	0.867
	0.529	0.683
	0.322	0.772
	0.636	0.468
	0.354	0.849
	0.885	0.803
	0.513	0.794
	0.795	0.858
	0.856	0.57
	0.793	0.904
	0.505	0.65
	0.738	0.828
	0.787	0.303
	0.917	0.765
	0.871	0.684
	0.888	0.871
	0.801	0.931
	0.845	0.542
	0.892	0.843
	0.625	0.972
	0.684	0.753
	0.864	0.828
	0.858	0.85
	0.762	0.853
	0.879	0.699
	0.802	0.841
	0.802	0.672
	0.936	0.656
	0.769	0.783
	0.602	0.919
	0.86	0.799
	0.87	0.656
	0.751	0.854
	0.854	0.923
	0.645	0.857
	0.727	0.909
	0.74	0.783
	0.468	0.761
	0.359	0.856
	0.765	0.912
	0.399	0.817
	0.46	0.636
	0.935	0.654
	0.914	0.734
	0.548	0.386
	0.777	0.785
	0.679	0.68
	0.456	0.902
	0.867	0.925
	0.539	0.891
	0.396	0.746
	0.912	0.835
	0.685	0.562
	0.89	0.911
	0.906	0.767
	0.931	0.757
	0.525	0.955
	0.915	0.856
	0.793	0.879
	0.824	0.5
	0.804	0.662
	0.885	0.933
	0.478	0.823
	0.628	0.876
	0.68	0.523
	0.925	0.838
	0.795	0.798
	0.931	0.906
	0.907	0.969
	0.834	0.574
	0.66	0.822
	0.85	0.894
	0.907	0.718
	0.842	0.852
	0.941	0.932
	0.885	0.985
	0.719	0.688
	0.913	0.833
	0.873	0.907
	0.685	0.905
	0.47	0.564
	0.617	0.932
	0.337	0.481
	0.851	0.891
	0.49	0.772
	0.833	0.727
	0.883	0.695
	0.913	0.884
	0.637	0.877
	0.473	0.812
	0.602	0.742
	0.906	0.916
	0.802	0.933
	0.765	0.967
	0.726	0.923
	0.819	0.762
	0.922	0.694
	0.533	0.91
	0.18	0.903
	0.503	0.878
	0.791	0.865
	0.786	0.978
	0.462	0.858
	0.706	0.788
	0.873	0.77
	0.626	0.934
	0.461	0.927
	0.874	0.948
	0.503	0.878
	0.648	0.38
	0.628	0.829
	0.804	0.948
	0.732	0.929
	0.869	0.962
	0.634	0.861
	0.777	0.924
	0.899	0.61
	0.701	0.458
	0.765	0.94
	0.638	0.511
	0.65	0.706
	0.388	0.945
	0.926	0.82
	0.834	0.801
	0.873	0.548
	0.966	0.861
	0.924	0.897
	0.966	0.936
	0.712	0.593
	0.696	0.605
	0.87	0.541
	0.285	0.798
	0.296	0.216
	0.876	0.9
	0.883	0.486
	0.437	0.96
	0.866	0.876
	0.687	0.669
	0.768	0.667
	0.72	0.924
	0.757	0.764
	0.906	0.897
	0.569	0.605
	0.953	0.88
	0.957	0.693
	0.887	0.875
	0.794	0.993
	0.666	0.891
	0.453	0.903
	0.884	0.551
	0.871	0.963
	0.733	0.926
	0.525	0.978
	0.568	0.946
	0.799	0.952
	0.698	0.977
	0.824	0.894
	0.629	0.596
	0.343	0.958
	0.273	0.95
	0.762	0.919
	0.716	0.939
	0.394	0.985
	0.624	0.963
	0.809	0.947
	0.894	0.874
	0.635	0.867
	0.854	0.884
	0.211	0.895
	0.489	0.904
	0.498	0.872
	0.569	0.799
	0.636	0.847
	0.57	0.615
	0.757	0.843
	0.401	0.873
	0.729	0.835
	0.575	0.908
	0.586	0.775
	0.76	0.774
	0.883	0.612
	0.873	0.85
	0.761	0.752
	0.779	0.929
	0.714	0.793
	0.902	0.754
	0.806	0.951
	0.462	0.887
	0.277	0.973
	0.694	0.978
	0.822	0.826
	0.501	0.943
	0.944	0.886
	0.574	0.685
	0.85	0.924
	0.293	0.9
	0.533	0.951
	0.337	0.955
	0.811	0.903
	0.77	0.681
	0.885	0.935
	0.367	0.943
	0.795	0.65
	0.896	0.947
	0.625	0.803
	0.598	0.854
	0.788	0.644
	0.762	0.967
	0.816	0.895
	0.485	0.922
	0.415	0.932
	0.831	0.906
	0.597	0.976
	0.667	0.938
	0.462	0.582
	0.84	0.724
	0.801	0.836
	0.898	0.922
	0.863	0.918
	0.611	0.727
	0.72	0.957
	0.343	0.955
	0.455	0.868
	0.461	0.561
	0.353	0.969
	0.699	0.908
	0.511	0.483
	0.397	0.909
	0.344	0.96
	0.523	0.715
	0.526	0.923
	0.915	0.92
	0.382	0.931
	0.289	0.874
	0.489	0.953
	0.329	0.962
	0.552	0.825
	0.486	0.609
	0.893	0.977
	0.631	0.906
	0.879	0.88
	0.671	0.955
	0.585	0.72
	0.859	0.862
	0.804	0.929
	0.548	0.914
	0.556	0.726
	0.316	0.848
	0.472	0.888
	0.815	0.889
	0.373	0.816
	0.804	0.901
	0.806
	0.618
	0.349
	0.47
	0.648
	0.393
	0.638
	0.872
	0.462
	0.631
mean	0.687335	0.816408
p value by t test		<0.0001
