# Supplementary material for: Pregnancy-associated plasma protein-aa regulates endoplasmic reticulum–mitochondria associations
Source: eLife. 2021 Mar 24;10:e59687. doi: 10.7554/eLife.59687 (PMC8024009; doi:10.7554/eLife.59687)
Supplement: Figure 3—source data 4. [file elife-59687-fig3-data4.xlsx]

## Sheet: Sheet1
	pappaa+/+	pappaap170
	2.09582	2.09156
	1.79921	1.31867
	1.72435	3.61004
	4.77267	2.15699
	2.254	1.45697
	1.57643	1.52342
	1.43993	1.47346
	2.55072	1.87214
	1.12796	2.59935
	1.73091	1.37527
	1.58133	1.65381
	2.68354	1.90019
	5.95387	2.22572
	1.62484	3.73092
	5.72394	1.67715
	1.51173	1.92391
	3.83456	1.34434
	1.60482	1.69771
	1.82245	3.58964
	1.32779	1.33251
	3.70746	2.22122
	1.91744	1.82389
	1.43911	3.7421
	1.26138	2.12575
	1.07341	2.17345
	1.65461	1.4602
	1.66233	1.16047
	1.20726	3.2866
	1.23132	1.61365
	2.45484	1.02259
	2.33756	1.71893
	1.51618	1.58539
	1.46905	1.40144
	2.09096	1.85828
	1.48172	2.50622
	1.08844	1.42343
	1.87734	2.58033
	1.39652	2.47689
	1.42655	1.75308
	2.15759	1.18754
	1.06647	1.63659
	1.373	2.33997
	1.55534	1.75422
	1.74955	1.24116
	1.68528	1.10088
	1.80435	1.26904
	1.45778	1.90101
	2.45038	1.94227
	3.37683	1.29208
	1.75896	1.42357
	1.23922	1.85166
	1.60414	1.16662
	1.36564	2.57325
	1.48556	2.29883
	3.1182	5.91435
	1.98168	2.0961
	2.46317	2.56913
	3.07441	1.59362
	1.04266	1.46309
	3.18269	1.38264
	4.25835	2.25848
	1.30387	1.42698
	2.59233	3.23671
	1.08298	1.43072
	1.46086	2.16787
	1.31035	2.29165
	3.19769	1.38097
	1.45427	1.3627
	1.83257	1.46468
	1.40392	3.29901
	2.02239	2.60031
	1.43403	1.27032
	3.94501	1.57543
	2.61177	1.0818
	1.99662	2.4683
	1.11997	1.537
	1.86212	1.79672
	1.41335	1.16918
	1.48015	1.0556
	1.57451	3.41064
	2.43136	1.60479
	1.19822	1.53802
	1.33267	2.22182
	1.37813	1.62668
	1.16386	1.18395
	1.37624	1.11095
	1.68033	2.58855
	1.19646	1.70046
	1.59386	1.48141
	2.34009	1.34794
	3.01988	3.16891
	2.4071	1.11654
	3.86266	2.49682
	1.7432	1.39964
	2.70567	2.04861
	1.8836	2.53055
	1.6087	2.41993
	1.23701	1.30299
	2.80126	1.44154
	2.71817	2.00895
	2.97524	2.35813
	1.4569	1.44374
	1.74091	1.0737
	2.19835	1.17795
	1.79081	1.47177
	1.16475	1.98597
	1.04113	2.72101
	3.50126	1.30402
	4.01261	1.45733
	3.60882	1.69697
	1.9138	1.578
	1.75647	1.09936
	1.94215	1.474
	2.23677	1.97645
	1.24541	2.19094
	2.83346	1.28011
	4.44723	1.15233
	1.27646	1.25033
	3.63346	1.59216
	2.82892	1.12214
	2.50859	1.8271
	1.88967	1.29396
	1.87936	1.31713
	1.33762	1.10544
	2.97766	1.61166
	1.78618	1.24759
	1.43092	2.84235
	2.60268	4.17671
	1.85599	1.15579
	2.88114	3.42757
	2.731	2.03341
	4.9292	1.20595
	1.28794	2.04651
	1.6182	1.52566
	1.61322	2.71301
	1.04874	1.66865
	1.21827	1.28995
	1.12192	1.42901
	1.80792	3.01872
	2.34208	3.23261
	1.50472	3.49709
	6.94106	2.12577
	2.88055	6.00214
	1.51144	1.54124
	1.46752	4.39494
	4.08303	1.09486
	1.34077	1.62745
	1.98323	1.77251
	2.11623	2.87346
	2.51964	1.34096
	2.27111	1.87269
	1.48146	1.40007
	1.78998	3.02288
	1.19836	1.45204
	1.07933	1.82333
	1.10292	1.52658
	1.45686	1.04716
	2.6971	1.43597
	4.26533	1.1595
	1.6659	2.9585
	1.60374	1.18827
	2.01038	1.39546
	3.36918	1.16512
	3.2769	1.36394
	1.62217	1.27529
	2.32648	1.17915
	1.89019	1.60716
	2.48303	2.62066
	6.33137	1.12941
	7.40363	1.15376
	1.74567	1.29252
	2.26231	1.1728
	5.80824	1.09457
	2.8964	1.24262
	1.61164	1.30189
	1.54443	1.46221
	2.28287	1.4359
	1.6835	1.05559
	2.93934	1.11287
	3.66853	1.14562
	4.18989	1.50551
	2.64419	1.63737
	2.78965	1.82889
	1.94799	3.0061
	1.99795	1.41661
	1.87303	1.62418
	1.85661	1.77293
	3.38037	1.13236
	2.95077	2.04861
	1.80707	1.85105
	1.13188	3.23074
	1.66165	1.79518
	1.99033	2.16757
	2.17277	1.30336
	2.18752	1.95169
	1.28421	2.01245
	1.87005	1.34455
	4.12793	1.47274
	6.38844	1.05568
	2.17198	1.15303
	1.57112	1.76564
	3.98678	1.2383
	1.14073	1.52923
	3.2147	2.55377
	1.69004	1.19735
	6.48224	1.46645
	2.56724	1.35967
	3.88261	1.23875
	1.9757	1.189
	1.9597	2.45447
	1.36264	1.30297
	4.59196	1.03073
	2.13656	2.55439
	1.59131	1.10546
	3.11395	2.09343
	3.02252	1.37041
	1.54113	3.0191
	1.3062	1.16599
	1.59345	1.38407
	2.96155	1.13731
	3.91632	1.41384
	1.81263	1.47295
	3.30329	1.16302
	1.46195	1.43893
	3.78586	2.63086
	1.36738	2.48639
	1.80793	1.77694
	1.5529	1.36876
	1.56284	1.53029
	2.49128	2.41583
	2.24731	1.17683
	6.2855	1.15982
	4.50891	1.65149
	4.09184	3.29096
	5.95028	1.14006
	2.16631	1.5358
	3.44965	3.34718
	4.87007	1.50452
	5.59345	1.1413
	2.58974	2.60521
	2.14401	1.29686
	1.34948	1.24947
	5.24459	1.2423
	6.37523	1.72405
	4.36846	1.29437
	6.03606	1.04993
	2.9607	1.99733
	4.19593	3.04386
	1.55825	1.09722
	2.53524	1.46193
	1.45063	1.48693
	2.28474	1.18381
	1.44588	2.31362
	1.68325	1.5175
	1.53944	1.43371
	3.41473	1.13181
	3.52043	2.23509
	4.40092	1.46442
	2.49136	1.43177
	1.80859	1.2106
	5.77981	1.34556
	2.07772	1.38181
	1.9524
	2.67739
	5.93436
	2.42886
	2.85345
	5.19365
	2.90386
	1.49901
	3.40916
	3.02876
mean	2.43063	1.8029
p value by t test		<0.0001
