# Supplementary material for: Pregnancy-associated plasma protein-aa regulates endoplasmic reticulum–mitochondria associations
Source: eLife. 2021 Mar 24;10:e59687. doi: 10.7554/eLife.59687 (PMC8024009; doi:10.7554/eLife.59687)
Supplement: Figure 3—source data 5. [file elife-59687-fig3-data5.xlsx]

## Sheet: Sheet1
	pappaa+/+	pappaap170
	107.236	123.503
	130.323	105.738
	102.593	96.8057
	102.057	104.025
	84.3077	134.015
	95.0247	98.0774
	122.698	88.9211
	58.9858	95.4072
	95.7728	109.934
	108.364	71.8222
	153.802	70.2416
	104.417	70.0345
	96.3906	131.175
	96.7781	47.9827
	96.7691	94.6582
	80.4507	105.94
	115.463	75.8088
	86.3468	94.1471
	76.9892	64.4716
	82.6706	143.63
	78.716	184.913
	87.6315	119.992
	70.0155	150.538
	91.4252	152.558
	65.4414	142.321
	96.7059	81.0472
	80.5715	77.8261
	68.4501	86.0855
	99.6177	110.779
	106.569	152.86
	101.316	216.862
	124.372	100.637
	90.4849	86.9366
	81.3145	69.1042
	103.448	59.7967
	127.255	76.2687
	115.17	169.717
	96.9679	116.322
	128.282	226.864
	118.77	103.317
	111.144	97.8512
	139.991	113.243
	92.4126	90.7022
	109.647	106.121
	67.5444	129.212
	129.593	112.854
	162.321	107.752
	191.855	161.455
	112.61	120.921
	102.305	75.9588
	173.886	247.142
	161.333	227.056
	128.548	137.191
	118.086	115.728
	64.6227	127.839
	57.0867	102.954
	110.441	119.567
	86.1797	68.5775
	109.241	73.2745
	74.6094	102.022
	181.35	112.43
	94.4536	108.413
	128.916	94.684
	90.6403	140.246
	103.349	131.529
	101.993	78.4534
	126.106	126.652
	134.557	97.2708
	98.9908	100.508
	118.705	148.365
	99.7836	167.843
	125.374	123.959
	95.1765	150.059
	108.925	108.74
	96.5006	76.8361
	78.9536	90.9175
	89.4057	82.8446
	76.2646	213.759
	83.9327	115.682
	94.542	168.429
	77.1626	75.5466
	102.568	88.2034
	95.9827	105.422
	85.1712	94.8761
	95.3038	124.476
	73.9044	105.761
	68.8782	94.5811
	98.7917	95.4381
	86.8622	97.3932
	89.2568	88.9363
	87.4387	202.496
	122.641	142.207
	124.245	214.011
	103.394	105.756
	72.8508	135.711
	173.976	88.0932
	124.711	103.49
	78.2415	86.1486
	207.927	109.274
	138.459	97.8456
	131.551	96.6038
	93.6114	107.338
	195.426	140.622
	160.836	140.016
	177.406	159.696
	129.069	131.351
	110.993	150.528
	123.398	122.975
	108.772	112.273
	157.237	98.5013
	94.5114	94.6944
	87.7573	109.767
	121.511	187.201
	94.6998	75.2298
	177.738	107.94
	121.35	153.941
	129.647	136.671
	92.0011	120.676
	89.7584	107.501
	102.361	133.884
	80.293	108.982
	115.301	126.439
	230.171	98.2586
	162.136	95.2691
	65.4082	106.98
	112.133	81.0839
	91.4233	134.231
	42.0737	114.182
	66.9856	102.229
	82.2364	101.666
	93.5229	90.9773
	110.393	79.0058
	114.231	104.763
	78.1416	141.396
	108.467	137.947
	90.5973	111.136
	118.201	75.293
	121.596	89.8273
	135.494	121.886
	183.91	91.5937
	203.307	110.846
	93.917	93.2326
	106.628	120.042
	82.6022	149.689
	68.1268	119.94
	117.702	94.1665
	114.277	140.648
	134.855	72.1902
	79.4837	117.914
	84.4281	111.341
	170.818	109.505
	90.1993	116.101
	69.5418	128.77
	123.628	129.028
	141.38	127.637
	115.052	125.756
	74.021	89.9567
	89.0897	119.399
	117.584	84.7908
	123.316	104.2
	119.966	104.15
	138.414	101.145
	85.5428	109.791
	139.038	94.7745
	92.7991	95.3274
	98.672	94.3819
	102.442	109.679
	121.093	76.5004
	151.371	62.5468
	96.6089	87.5371
	185.803	78.8011
	101.503	81.435
	115.794	102.972
	94.6499	80.4739
	71.3118	97.2156
	125.693	77.3752
	83.6311	70.3715
	122.325	62.7541
	162.185	62.1088
	85.7122	73.2844
	98.4661	74.451
	109.677	40.579
	93.8293	57.5876
	108.99	76.73
	147.067	62.1473
	130.254	84.6066
	83.6969	68.6289
	150.398	121.252
	116.202	143.412
	80.3732	95.2243
	96.4214	144.106
	112.273	105.724
	132.353	64.0251
	147.528	73.3192
	98.5365	96.8825
	143.88	92.5087
	140.821	78.0922
	138.042	70.7868
	101.091	126.284
	84.5229	95.2931
	103.341	87.7546
	149.971	81.3544
	82.0445	71.2468
	113.579	80.2368
	148.797	82.2852
	148.108	83.8531
	181.043	72.5724
	121.154	79.6808
	91.4863	74.8286
	183.995	107.656
	74.3609	71.8344
	112.56	71.9386
	109.743	68.9682
	86.3597	79.259
	126.077	82.8138
	151.954	77.5774
	102.509	89.7416
	88.4665	81.0926
	83.2116	109.124
	123.453	105.276
	120.856	106.789
	103.816	62.7904
	124.221	119.991
	140.411	58.942
	126.393	109.507
	87.0682	89.2912
	163.619	110.03
	108.202	77.7257
	125.033	64.7994
	113.058	90.4637
	102.303	70.9979
	76.6706	55.654
	113.339	86.8101
	123.623	75.0699
	110.696	84.0923
	123.6	81.7154
	85.5179	100.795
	104.117	71.3118
	97.0512	61.4175
	150.087	101.074
	128.862	75.2466
	143.407	69.145
	135.378	83.833
	86.1618	46.6049
	129.352	67.326
	107.168	64.0706
	113.597	63.8897
	114.69	104.627
	80.6324	66.9377
	141.382	69.7606
	132.695	72.2506
	133.885	60.5797
	170.961	109.02
	130.697	93.0734
	107.217	64.4633
	114.186	78.1594
	119.341	94.2881
	111.225	49.7391
	126.451	82.5197
	152.175	72.7668
	87.5018	77.6957
	72.0826	82.5116
	130.404
	114.027
	89.9698
	123.425
	95.7822
	98.7406
	127.096
	142.063
	76.3086
	152.661
mean	111.955	102.628
p value by t test		<0.0001
