# Supplementary material for: Pregnancy-associated plasma protein-aa regulates endoplasmic reticulum–mitochondria associations
Source: eLife. 2021 Mar 24;10:e59687. doi: 10.7554/eLife.59687 (PMC8024009; doi:10.7554/eLife.59687)
Supplement: Figure 3—source data 6. [file elife-59687-fig3-data6.xlsx]

## Sheet: Sheet1
	larva	pappaa+/+	pappaap170
	1	0.3643	0.4127
	2	0.3182	0.4386
	3	0.3217	0.4069
	4	0.2946	0.3536
	5	0.2524	0.3943
	6	0.2705	0.4319
	7	0.248	0.4522
	8	0.3346	0.3717
	mean	0.300538	0.407738
	p value by t test		<0.0001
