# Supplementary material for: Pregnancy-associated plasma protein-aa regulates endoplasmic reticulum–mitochondria associations
Source: eLife. 2021 Mar 24;10:e59687. doi: 10.7554/eLife.59687 (PMC8024009; doi:10.7554/eLife.59687)
Supplement: Figure 4—source data 1. [file elife-59687-fig4-data1.xlsx]

## Sheet: Sheet1
	pappaa+/+	pappaap170
	3	2
	3	7
	3	0
	0	3
	0	0
	0	2
	5	5
	3	1
	4	0
	3	0
	2	0
	4	4
	3	1
	4	3
	0	2
	11	0
	3	0
	4	0
	9	0
		0
		0
		0
mean	3.36842	1.36364
p value by t test		0.0064
mean
p value by t test
