# Supplementary material for: Pregnancy-associated plasma protein-aa regulates endoplasmic reticulum–mitochondria associations
Source: eLife. 2021 Mar 24;10:e59687. doi: 10.7554/eLife.59687 (PMC8024009; doi:10.7554/eLife.59687)
Supplement: Figure 4—source data 2. [file elife-59687-fig4-data2.xlsx]

## Sheet: Sheet2
	wild type
	Larva	1								2					3				4
	Hair cell	HC1	HC2	HC3	HC4	HC5	HC6	HC7	HC8	HC1	HC2	HC3	HC4	HC5	HC1	HC2	HC3	HC4	HC1	HC2	HC3	HC4	HC5	Mean	p value by 2-way ANOVA
minutes post neo-TR	2.5	4.30052	0.983055	2.12373	1.98594	2.1067	2.332	1.00889	0.487997	31.0485	5.30916	3.75149	3.75118	10.0802	1.01771	1.38555	0.104601	3.09436	1.61308	3.93828	3.4574	1.96712	1.75552	3.98195	0.9003
	4.5	9.85646	1.32581	7.14315	4.32977	4.28396	4.04639	1.58456	0.970947	48.9949	9.44641	6.22235	4.78497	21.5115	2.76228	2.68914	0.935695	2.91422	4.11803	11.4101	12.9859	4.60771	3.56918	7.7497	0.9003
	6.5	16.3595	1.68322	15.8592	9.50891	5.33073	8.48695	2.50501	1.04104	52.2561	15.1978	13.323	5.16878	18.0539	4.71163	5.35089	1.52247	3.27508	4.68243	29.2791	5.56633	10.4693	3.45284	10.5947	0.8433
	pappaa p170
	Larva	1							2					3					4
	Hair cell	HC1	HC2	HC3	HC4	HC5	HC6	HC7	HC1	HC2	HC3	HC4	HC5	HC1	HC2	HC3	HC4	HC5	HC1	HC2	HC3	HC4	HC5	Mean
minutes post neo-TR	2.5	6.26273	0.23867	2.38118	3.78345	5.61808	0.798044	1.64244	10.8693	5.99659	3.97147	0.708324	1.84889	5.18324	3.52828	3.61854	9.6579	4.27209	1.30831	1.32299	0.849318	0.873255	0.511392	3.4202
	4.5	42.2292	8.76203	5.09461	7.69193	22.6354	4.60808	9.88733	17.9642	13.0701	7.62072	0.0949114	1.93181	7.34053	4.55656	5.73118	20.3012	6.99848	2.9491	2.44023	1.41164	1.48263	0.955728	8.89807
	6.5	46.8746	29.1123	23.1429	16.2971	24.5408	6.95514	17.9321	17.9241	16.1128	19.9981	0.531999	2.80062	11.6423	4.23308	5.38494	17.9365	9.81518	3.18963	2.12217	0.605143	1.24424	0.720328	12.6871
