# Supplementary material for: Pregnancy-associated plasma protein-aa regulates endoplasmic reticulum–mitochondria associations
Source: eLife. 2021 Mar 24;10:e59687. doi: 10.7554/eLife.59687 (PMC8024009; doi:10.7554/eLife.59687)
Supplement: Figure 4—source data 3. [file elife-59687-fig4-data3.xlsx]

## Sheet: Sheet2
	wild type
	Larva	1							2					3					4
	Hair cell	HC1	HC2	HC3	HC4	HC5	HC6	HC7	HC1	HC2	HC3	HC4	HC5	HC1	HC2	HC3	HC4	HC5	HC1	HC2	HC3	HC4	HC5	Mean	p value by t test
	Max ΔF/F	16.4244	2.07458	37.5203	9.50891	7.66319	10.5008	3.80478	1.58315	56.7724	21.7308	16.6334	5.69334	21.6366	11.0047	12.7311	3.99466	3.35257	7.38381	29.2791	15.5612	10.4693	4.8911	14.1006	0.4219
	pappaa p170
	Larva	1							2					3					4
	Hair cell	HC1	HC2	HC3	HC4	HC5	HC6	HC7	HC1	HC2	HC3	HC4	HC5	HC1	HC2	HC3	HC4	HC5	HC1	HC2	HC3	HC4	HC5	Mean
	Max ΔF/F	50.6077	56.3018	56.5642	26.4009	29.6755	6.95514	21.3234	19.1963	17.8084	25.5529	18.7346	18.5496	16.9189	4.55656	5.74875	21.3555	11.9484	3.497	2.50915	1.41164	1.48263	1.07786	19.008
