# Supplementary material for: Pregnancy-associated plasma protein-aa regulates endoplasmic reticulum–mitochondria associations
Source: eLife. 2021 Mar 24;10:e59687. doi: 10.7554/eLife.59687 (PMC8024009; doi:10.7554/eLife.59687)
Supplement: Figure 4—source data 4. [file elife-59687-fig4-data4.xlsx]

## Sheet: Sheet1
	pappaa p170	pappaa p170+120 uM NBI-31772
	1	5
	0	7
	0	4
	1	4
	2	4
	0	3
	4	1
	0	5
	0	3
	1	0
	0	0
	0	3
	2	4
	0	5
	1	3
	4	4
	3	6
	0	3
	4	4
	1	3
	0	2
	2	2
	0	5
	0	0
	0
	0
	3
	0
	0
	0
mean	0.966667	3.33333
p value by t test		<0.0001
