# Supplementary material for: Pregnancy-associated plasma protein-aa regulates endoplasmic reticulum–mitochondria associations
Source: eLife. 2021 Mar 24;10:e59687. doi: 10.7554/eLife.59687 (PMC8024009; doi:10.7554/eLife.59687)
Supplement: Figure 5—source data 1. [file elife-59687-fig5-data1.xlsx]

## Sheet: Sheet1
		pappaa+/+				pappaap170
		RQ (fold change)			mean	RQ			mean	p value by 2-way ANOVA
	bip	0.821092	1.21724		1.01916	2.457	2.212	2.665	2.44467	0.0003
	atf4	0.919089	1.17776	0.922873	1.00657	5.05	3.683	4.123	4.28533	<0.0001
	xbp1-s	0.90991	1.09901		1.00446	1.75415	2.01302		1.88358	0.033
	chop	1.16159	0.860888		1.01124	1.2462	1.15703		1.20162	0.5242
