# Supplementary material for: Pregnancy-associated plasma protein-aa regulates endoplasmic reticulum–mitochondria associations
Source: eLife. 2021 Mar 24;10:e59687. doi: 10.7554/eLife.59687 (PMC8024009; doi:10.7554/eLife.59687)
Supplement: Figure 5—source data 2. [file elife-59687-fig5-data2.xlsx]

## Sheet: 1
	wild type																		pappaa p170
Tunicamycin	0 μM				2 μM				0 μM				3 μM					Tunicamycin	0 μM				2 μM				0 μM				3 μM
	neuromast 1	neuromast 2	neuromast 3	mean	neuromast 1	neuromast 2	neuromast 3	mean	neuromast 1	neuromast 2	neuromast 3	mean	neuromast 1	neuromast 2	neuromast 3	mean			neuromast 1	neuromast 2	neuromast 3	mean	neuromast 1	neuromast 2	neuromast 3	mean	neuromast 1	neuromast 2	neuromast 3	mean	neuromast 1	neuromast 2	neuromast 3	mean
larva 1	19	13	10	14	7	8	8	7.66667	10	11	9	10	12	9	7	9.33333		larva 1	11	12	18	13.6667	9	6	9	8	12	14	15	13.6667	12	6	8	8.66667
larva 2	12	15	12	13	10	9	13	10.6667	11	14	12	12.3333	8	8	10	8.66667		larva 2	8	8	10	8.66667	9	10	9	9.33333	17	9	10	12	7	6	9	7.33333
larva 3	9	13	11	11	10	12	14	12	10	10	11	10.3333	13	11	9	11		larva 3	18	10	12	13.3333	7	6	13	8.66667	12	15	18	15	7	7	7	7
larva 4	11	14	12	12.3333	12	14	16	14	12	12	10	11.3333	12	8	7	9		larva 4	12	12	7	10.3333	8	12	5	8.33333	12	12	11	11.6667	4	6	6	5.33333
larva 5	11	16	18	15	10	11	16	12.3333	11	15	11	12.3333	9	7	8	8		larva 5	10	14	10	11.3333	9	15	8	10.6667	13	10	15	12.6667	7	7	6	6.66667
larva 6	11	12	16	13	11	10	17	12.6667	12	14	10	12	6	9	14	9.66667		larva 6	9	13	7	9.66667	13	10	5	9.33333	10	11	11	10.6667	8	9	6	7.66667
larva 7	12	12	14	12.6667	10	12	19	13.6667	10	11	13	11.3333	12	10	9	10.3333		larva 7	12	17	14	14.3333	6	11	4	7	12	14	11	12.3333	6	8	9	7.66667
larva 8	14	14	12	13.3333	10	12	9	10.3333	9	13	11	11	6	11	8	8.33333		larva 8	8	12	11	10.3333	3	10	5	6	10	11	14	11.6667	6	7	6	6.33333
larva 9					14	9	11	11.3333	12	12	11	11.6667	6	5	6	5.66667		larva 9	13	11	12	12	4	12	8	8	10	10	9	9.66667	6	1	3	3.33333
																		larva 10	8	12	9	9.66667
mean				13.0417				11.6296				11.3704				8.88889		mean				11.3333				8.37037				12.1481				6.66667
% HC survival=[(mean number of hair cells within 3 neuromasts after treatment)/ (mean number of hair cells in no heatshock and vehicle treated group)] X 100
		wild type				pappaa p170
		2 μM	3 μM			2 μM	3 μM
	larva 1	58.7935	82.0874			70.609	71.3306
	larva 2	81.7996	76.224			82.3772	60.3567
	larva 3	92.0245	96.7458			76.4931	57.6132
	larva 4	107.362	79.1557			73.551	43.8957
	larva 5	94.5808	70.3606			94.1453	54.8697
	larva 6	97.137	85.0191			82.3772	63.1001
	larva 7	104.806	90.8824			61.7829	63.1001
	larva 8	79.2434	73.2923			52.9568	52.1262
	larva 9	86.9121	49.8388			70.609	27.4348
	mean hair cell survival (% vehicle-treated group)	89.1843	78.1784			73.8779	54.8697
2-way ANOVA with Holm-Sidak correction						0.0209	0.0016
